# Supplementary material
Source: PubMed Central journal article supplement (PMC3675233)
Supplement: mmc1.pdf [file mmc1.pdf]

## **Supplemental Data**

# **Mutations in *B3GALT6* that Encodes a Glycosaminoglycan Linker Region Enzyme Cause a Spectrum of Skeletal and Connective Tissue Disorders**

Masahiro Nakajima, Shuji Mizumoto, Noriko Miyake, Ryo Kogawa, Aritoshi Iida, Hironori Ito, Hiroshi Kitoh, Aya Hirayama, Hiroshi Mitsubuchi, Osamu Miyazaki, Rika Kosaki, Reiko Horikawa, Angeline Lai, Roberto Mendoza-Londono, Lucie Dupuis, David Chitayat, Andrew Howard, Gabriela Ferraz-Leal, Denise Cavalcanti, Yoshinori Tsurusaki, Hiroto Saito, Shigehiko Watanabe, Ekkehart Lausch, Sheila Unger, Luisa Bonafé, Hirofumi Ohashi, Andrea Superti-Furga, Naomichi Matsumoto, Kazuyuki Sugahara, Gen Nishimura, and Shiro Ikegawa

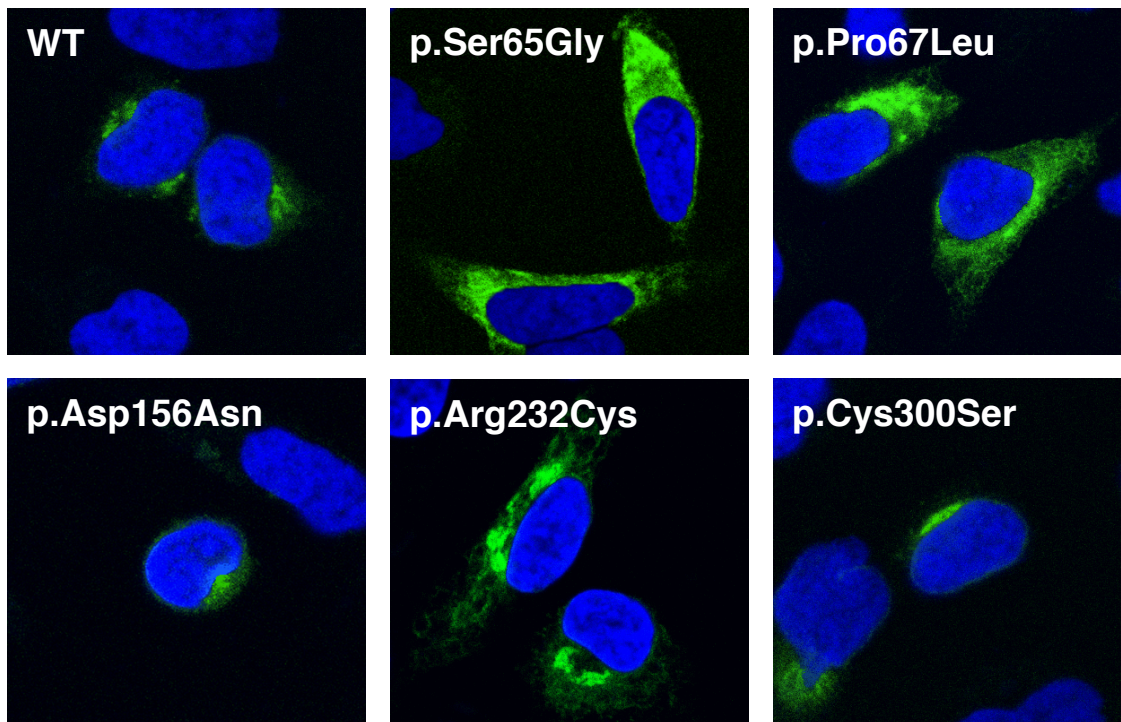

**Figure S1. Sub-cellular localization of the missense mutant B3GALT6 proteins**

Full-length *B3GALT6* cDNA for the wild type (WT) and missense mutants were cloned into the p3XFLAG-CMV14 vector and were expressed in HeLa cells. Cells were stained with anti-FLAG (green) and 4',6-diamidino-2-phenylindole (DAPI; blue). While WT, p.Asp156Asn and p.Cys300Ser B3GALT6 proteins were localized around nucleus, p.Ser65Gly, p.Pro67Leu and p.Arg232Cys B3GALT6 proteins were localized to cytoplasm.

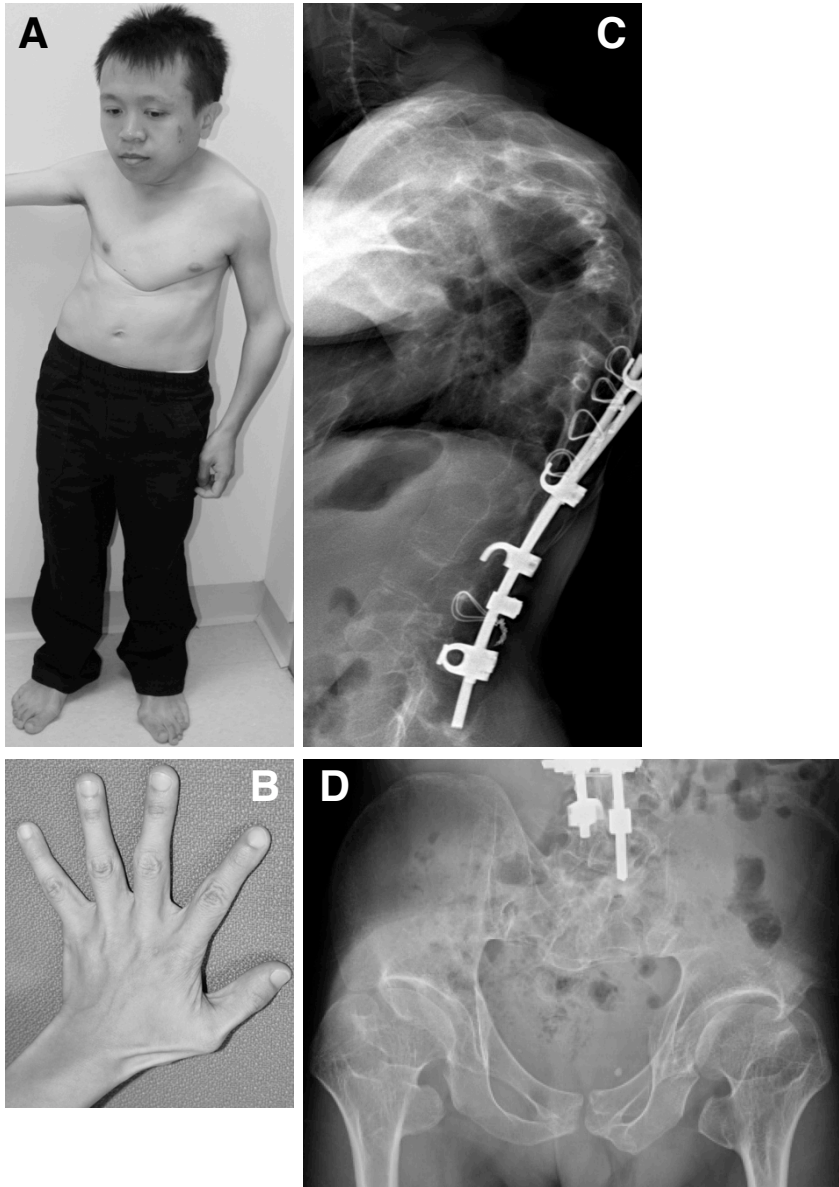

**Figure S2. Representative clinical pictures and X-rays for spondyloepimetaphyseal dysplasia with joint laxity 1 (SEMD-JL1) with *B3GALT6* mutations**

An individual with SEMD-JL1 (P8) at 34 years of age. **A, B:** clinical pictures. The individual had normal facies and intelligence, short trunk-short stature, protruded sternum and elbow deformities. He had no muscle hypotonia, skin problems and hand abnormalities. **C:** Lateral spine X-ray. Severe kyphoscoliosis. **D:** Hip X-ray showing short ilia, prominent lesser trochanter and short femoral neck.

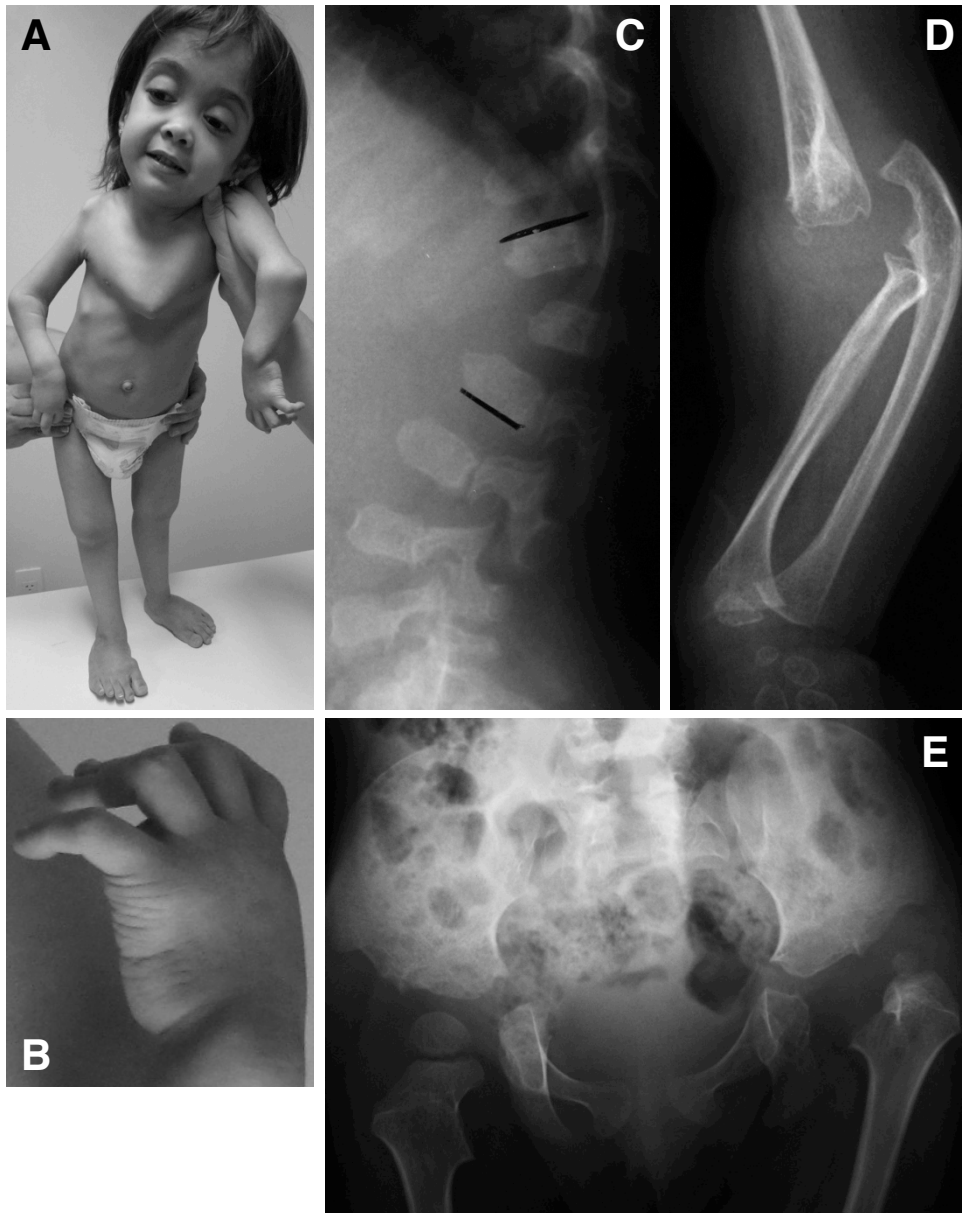

**Figure S3. Representative clinical pictures and X-rays for Ehlers-Danlos syndrome, progeroid form (EDS-PF) with *B3GALT6* mutations**

P12. **A, B:** clinical pictures at 5 years of age. She showed facial dysmorphism (flat face, prominent eyes and hypoplasia of the middle face with and sagging cheeks), wrinkled skin, muscular hypotonia, elbow deformity and clubfoot. **C:** Lateral spine X-ray at age 8 months showing thoraco-lumbar kyphosis, platyspondyly and anterior beak of vertebral body. **D, E:** X-rays of elbow (**D**) and hip (**E**) at age 1 year 6 months. Dislocations of the elbow and the left hip joint, epi-metaphyseal dysplasias of the long tubular bones.

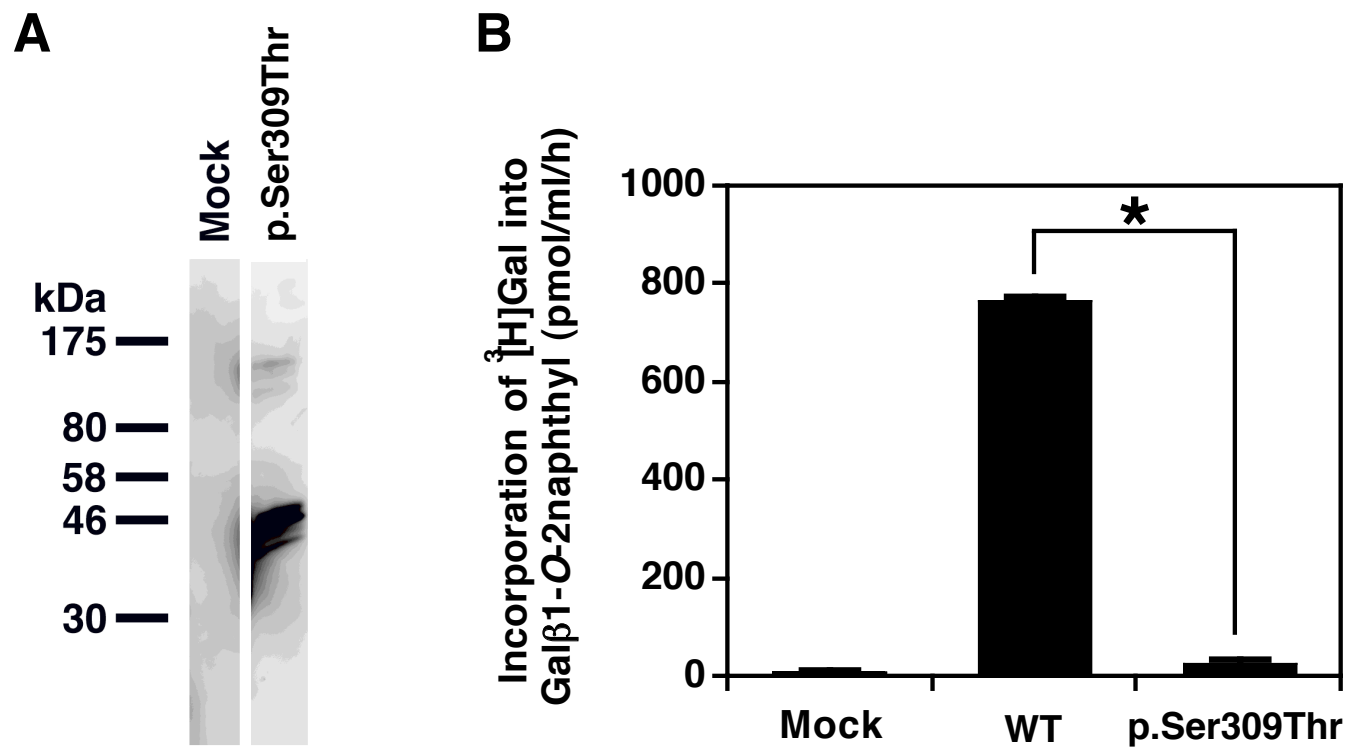

**Figure S4. Glycosyltransferase activity of the recombinant p.Ser309Thr B3GALT6 protein**

**A:** Western blotting of the mutant protein. **B:** Glycosyltransferase activity. “Mock” represents the conditioned medium transfected without the vector. The enzymatic activity of S309T is significantly decreased. \*,  $p < 0.0001$  versus wild-type by t-test.  $n=3$ .

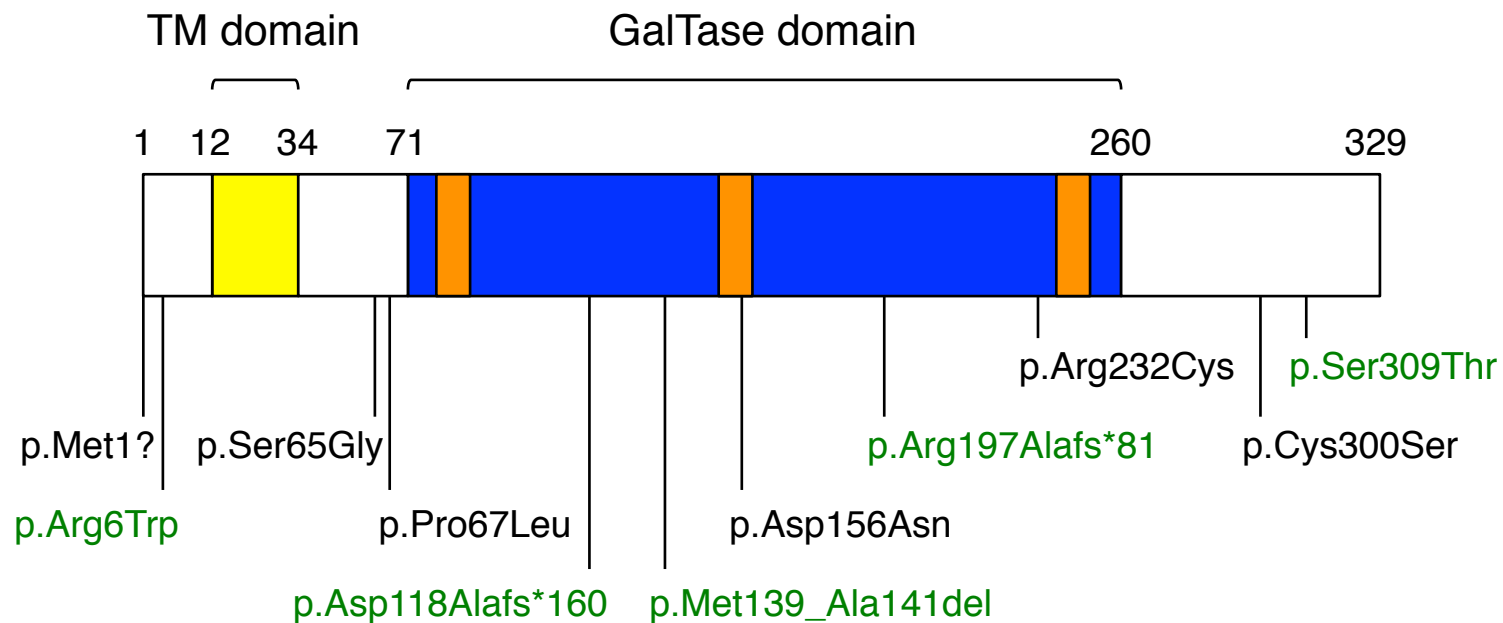

**Figure S5. A schematic of B3GALT6 protein and positions of identified mutations**

*B3GALT6* mutations identified in spondyloepimetaphyseal dysplasia with joint laxity type 1 and Ehlers-Danlos syndrome, progeroid form are indicated by black and green letters, respectively. Functional domains and motifs are color-coded: transmembrane (TM) domain (*yellow*), galactosyltransferase domain (*blue*),  $\beta$ 3-glycosyltransferase motifs (*orange*). GalTase, galactosyltransferase.

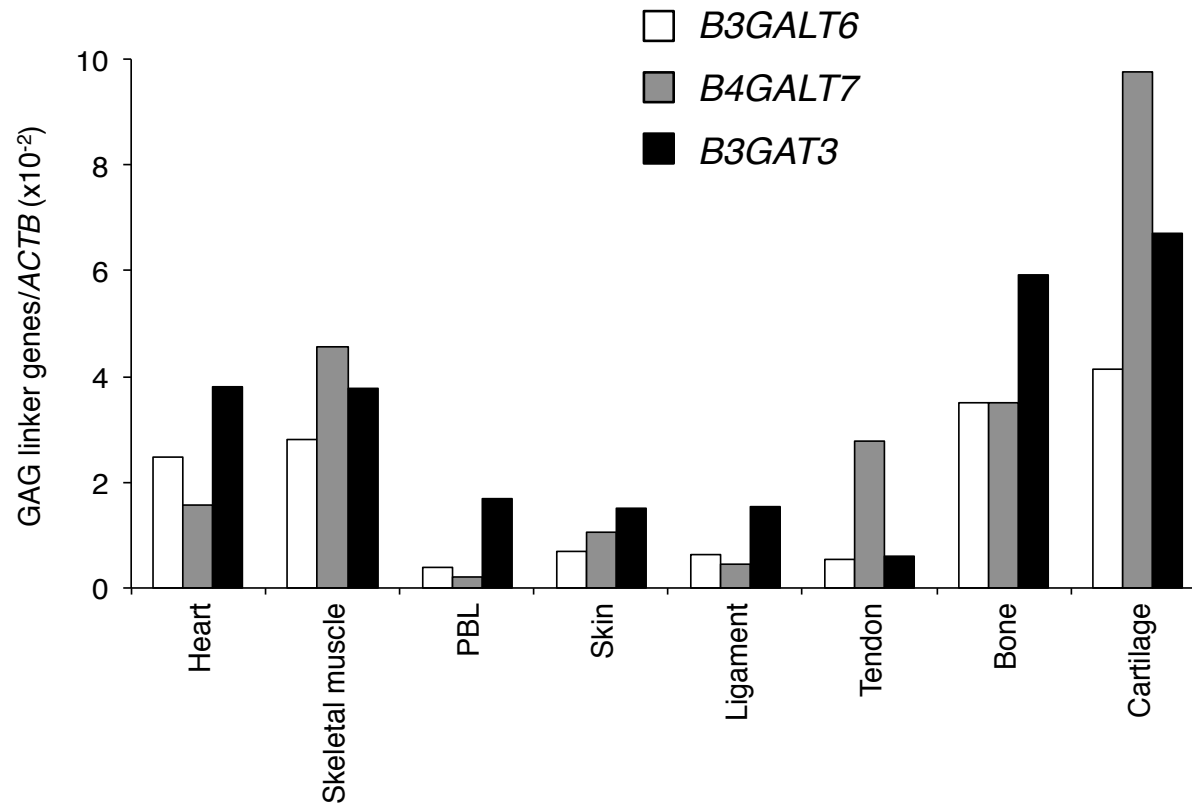

**Figure S6. Expression of the GAG linker genes (*B3GALT6*, *B4GALT7* and *B3GAT3*) mRNAs in human tissues determined by the real-time PCR analysis**

The three genes are broadly expressed with slightly different tissue-specificity patterns. Expression of the three genes are strong in cartilage, while their expression in skin, ligament and tendon are weak. The expression of *B4GALT7* in cartilage relative to other tissues is higher in comparison to those of *B3GALT6* and *B3GAT3*. PBL: peripheral blood leukocyte.

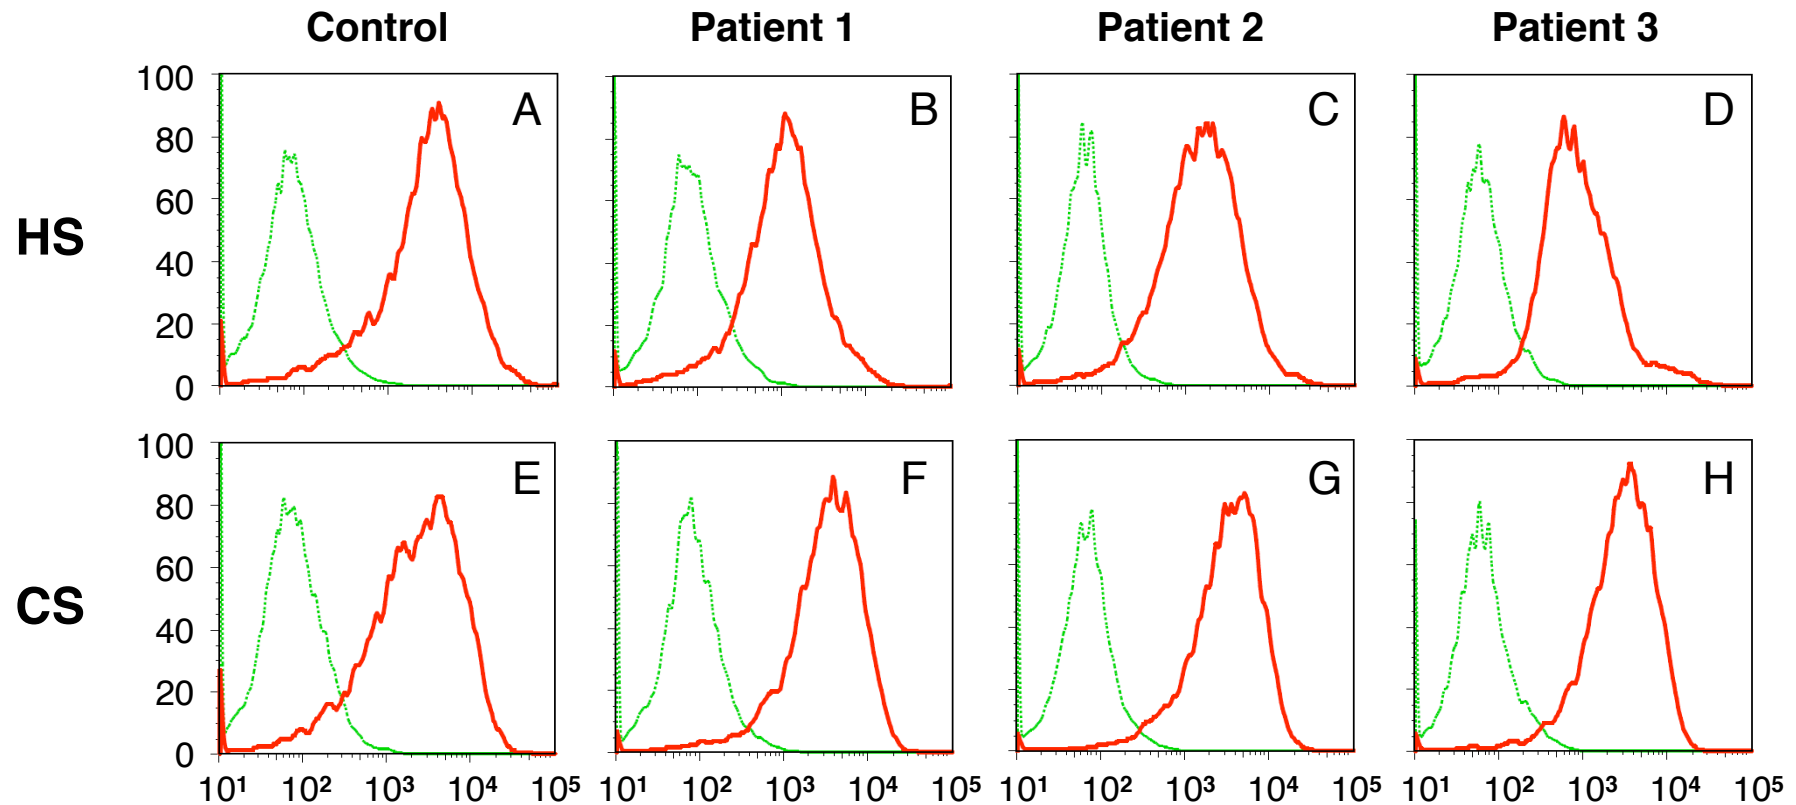

**Figure S7. Relative numbers of heparan sulfate (HS) and chondroitin sulfate (CS) chains in individuals with *B3GALT6* mutations**

A flow cytometry for the expression of HS (A-D) and CS (E-H) at the surface of lymphoblastoid cells. Horizontal axis: fluorescence intensity; vertical axis: relative cell number. A, E: control; B, F: Patient 1; C, G: Patient 2; D, H: Patient 3. For HS, the cells were treated with a mixture of heparinases-I and -III and then with anti-stub 3G10 antibody in HS; and for CS, with a chondroitinase ABC and then with anti-stub 2B6 antibody. The binding of the antibody to the epitopes was visualized after incubating with an Alexa Fluor 488-conjugated secondary antibody. The *red* and *green* histograms show the intensity of the fluorescence with or without the anti-stub antibodies, respectively.



**Table S1. Summary of the exome sequencing performance**

| Subject ID | No. of bases covered | Average depth of coverage | % of bases above 10x coverage | % of bases above 20x coverage |
|------------|----------------------|---------------------------|-------------------------------|-------------------------------|
| P1         | 4,743,306,135        | 141.7                     | 94.8                          | 91.1                          |
| P2         | 4,994,081,669        | 149.2                     | 94.9                          | 91.5                          |
| P3         | 3,697,409,162        | 110.5                     | 93.9                          | 88.5                          |
| P4         | 4,326,027,309        | 129.2                     | 94.8                          | 91.3                          |
| P5         | 4,433,501,338        | 132.5                     | 94.8                          | 91.5                          |
| P6         | 4,396,751,708        | 131.4                     | 94.8                          | 91.5                          |
| P7         | 4,519,248,092        | 135.0                     | 94.8                          | 91.5                          |
| Mean       | 4,444,332,202        | 132.8                     | 94.7                          | 91.0                          |

**Table S2. *B3GALT6* mutations identified in the individuals with spondyloepimetaphyseal dysplasia with joint laxity type 1 (SEMD-JL1) by exome sequencing and Sanger sequencing**

| Mutation          |                   | Subject |    |    |    |    |    |    |           |
|-------------------|-------------------|---------|----|----|----|----|----|----|-----------|
| Nucleotide change | Amino acid change | P1      | P2 | P3 | P4 | P5 | P6 | P7 | P8        |
|                   |                   | Exome   |    |    |    |    |    |    | Non-exome |
| c.1A>G            | p.Met1?           | ✓       | ✓  | ✓  | ✓  | ✓  |    | ✓  |           |
| c.193A>G          | p.Ser65Gly        |         |    |    |    |    |    | ✓  |           |
| c.200C>T          | p.Pro67Leu        |         |    |    |    |    |    |    | ✓         |
| c.466G>A          | p.Asp156Asn       |         |    | ✓  |    |    |    |    |           |
| c.694C>T          | p.Arg232Cys       | ✓       | ✓  |    |    | ✓  | ✓  |    | ✓         |
| c.899G>C          | p.Cys300Ser       |         |    |    |    |    | ✓  |    |           |

gray box: exome sequencing; checked box: Sanger sequencing. P1 and P2 are sibs.
